# Supplementary material for: An extended DeLone and McLean’s model to determine the success factors of e-learning platform
Source: PeerJ journal article supplement (doi:10.7717/peerj-cs.876), 2022-06-23
Supplement: Categorical_Data.pdf [file Categorical_Data.pdf]

**Questionnaire:**

| <b>System Quality SYQ</b>                                                                                                                             |      |
|-------------------------------------------------------------------------------------------------------------------------------------------------------|------|
| The Shaqra University e-learning platform provides high availability.                                                                                 | SYQ1 |
| The Shaqra University e-learning platform is easy to use.                                                                                             | SYQ2 |
| The Shaqra University e-learning platform user friendly.                                                                                              | SYQ3 |
| The Shaqra University e-learning platform provides interactive features between students and platform                                                 | SYQ4 |
| The Shaqra University e-learning platform provides a personalised information presentation.                                                           | SYQ5 |
| The Shaqra University e-learning platform has attractive features to appeal to students.                                                              | SYQ6 |
| The Shaqra University e-learning platform provides high-speed information access.                                                                     | SYQ7 |
| In general, I believe that the quality Shaqra University e-learning platform is high.                                                                 | SYQ8 |
| <b>Information Quality IN</b>                                                                                                                         |      |
| Shaqra University e-learning platform has provided me with sufficient and required information.                                                       | IN1  |
| Information and resources needed from Shaqra University e-learning platform are always accessible                                                     | IN2  |
| Information from Shaqra University e-learning platform is in a form that is readily useable                                                           | IN3  |
| Information in Shaqra University e-learning platform is concise and clear                                                                             | IN4  |
| The structure of Shaqra University e-learning platform is well organized into logical and understandable components                                   | IN5  |
| The content of Shaqra University e-learning platform is up to date                                                                                    | IN6  |
| I perceive the design of Shaqra University e-learning platform (e.g. fonts, style, colour, images, videos) to be good and meets the quality standards | IN7  |
| <b>Service Quality SQ</b>                                                                                                                             |      |

|                                                                                                                                   |     |
|-----------------------------------------------------------------------------------------------------------------------------------|-----|
| There are enough and clear instructions/training about how to use Shaqra University e-learning platform                           | SQ1 |
| Shaqra University e-learning platform provides proper online assistance and help                                                  | SQ2 |
| The IT services staff is available and cooperative when facing an error at Shaqra University e-learning platform                  | SQ3 |
| The IT services staff understands the specific needs of students                                                                  | SQ4 |
| I receive a satisfactory and timely response from the IT services staff                                                           | SQ5 |
| <b>Learner Quality LQ</b>                                                                                                         |     |
| I believe it is good to use Shaqra University e-learning platform                                                                 | LQ1 |
| I have a positive attitude toward using Shaqra University e-learning platform                                                     | LQ2 |
| I am not intimidated by using Shaqra University e-learning platform                                                               | LQ3 |
| My previous experience with e-learning systems and computer applications helped me in using Shaqra University e-learning platform | LQ4 |
| I am able to perform tasks in Shaqra University e-learning platform successfully                                                  | LQ5 |
| <b>Instructor Quality IQ</b>                                                                                                      |     |
| I use Shaqra University e-learning platform as recommended by my instructors                                                      | IQ1 |
| I think an instructor's enthusiasm about using Shaqra University e-learning platform stimulates my desire to learn                | IQ2 |
| I receive a prompt response to questions and concerns from my instructors in Shaqra University e-learning platform                | IQ3 |
| I think communicating and interacting with instructors are important and valuable in Shaqra University e-learning platform        | IQ4 |

|                                                                                                                |     |
|----------------------------------------------------------------------------------------------------------------|-----|
| Generally, my instructors have a positive attitude to the utilization of Shaqra University e-learning platform | IQ5 |
| <b>Satisfaction ST</b>                                                                                         |     |
| I am satisfied with the performance of Shaqra University e-learning platform                                   | ST1 |
| I enjoy using Shaqra University e-learning platform in my study                                                | ST2 |
| Shaqra University e-learning platform satisfies my educational needs                                           | ST3 |
| Overall, I am pleased with the experience of using Shaqra University e-learning platform                       | ST4 |
| <b>Perceived Usefulness PU</b>                                                                                 |     |
| Using Shaqra University e-learning platform enables me to accomplish my tasks more quickly                     | PU1 |
| Using Shaqra University e-learning platform improves my learning performance                                   | PU2 |
| Using Shaqra University e-learning platform helps me learn effectively                                         | PU3 |
| Overall Shaqra University e-learning platform is useful                                                        | PU4 |
| <b>Use U</b>                                                                                                   |     |
| I use Shaqra University e-learning platform frequently                                                         | U1  |
| I depend on Shaqra University e-learning platform in my study                                                  | U2  |
| I use Shaqra University e-learning platform regularly                                                          | U3  |
| On average, I spend a long time on using Shaqra University e-learning platform                                 | U4  |
| <b>Benefits B</b>                                                                                              |     |
| The Shaqra University e-learning platform increases my work productivity                                       | B1  |
| The Shaqra University e-learning platform improves the quality of learning.                                    | B2  |

|                                                                                                                               |    |
|-------------------------------------------------------------------------------------------------------------------------------|----|
| The Shaqra University e-learning platform facilitates information exchange                                                    | B3 |
| The Shaqra University e-learning platform improves collaborative and active learning.                                         | B4 |
| The Shaqra University e-learning platform increased knowledge transfer.                                                       | B5 |
| I believe that the Shaqra University e-learning platform helps me to achieve my educational goals..                           | B6 |
| In general, I believe that Shaqra University e-learning platform is successful and provides me more knowledge for my studies. | B7 |
