# Supplementary material for: An extended DeLone and McLean’s model to determine the success factors of e-learning platform
Source: PeerJ journal article supplement (doi:10.7717/peerj-cs.876), 2022-06-23
Supplement: Questionnaire.pdf [file Questionnaire.pdf]

Dear Participant,

This research aims to measure the success factors of using e-learning platform in Shaqra University based on Students' perspectives. The results of this research will help decision makers in the Shaqra University implement an effective e-learning platform.

Please participate in this survey and your answers will help the researchers analyse the data and will assist researchers to serve the Saudi society. I highly appreciate your time answering all the questions. Completion of this questionnaire will be take around 35-40 minutes. Please read the instructions and complete the questionnaire.

This questionnaire is completely anonymous. Your participation in this study is not-compulsory and you may discontinue your participation any time without explanations or fear of reprisal. Your information will be protected and only used to achieve the research requirements. The researcher has applied for ethical clearance from research ethics committee in college of computing and information technology at Shaqra University (Ref: Ethics Appl.1603202101) to make sure that this research will be conducted in the right way. Your consent to participate in this research will be implied by reading the information, completing and returning the questionnaire.

Please do not hesitate to contact me if you have any questions and thank you so much in advance for your participation.

Regards

Dr. Raed Alotaibi

[Alhafi@su.edu.sa](mailto:Alhafi@su.edu.sa)

Dr. Saeed Alshahrani

[salshahrani@su.edu.sa](mailto:salshahrani@su.edu.sa)

**Questionnaire:**

| <b>System Quality SYQ</b>                                                                                                                             |      |
|-------------------------------------------------------------------------------------------------------------------------------------------------------|------|
| The Shaqra University e-learning platform provides high availability.                                                                                 | SYQ1 |
| The Shaqra University e-learning platform is easy to use.                                                                                             | SYQ2 |
| The Shaqra University e-learning platform user friendly.                                                                                              | SYQ3 |
| The Shaqra University e-learning platform provides interactive features between students and platform                                                 | SYQ4 |
| The Shaqra University e-learning platform provides a personalised information presentation.                                                           | SYQ5 |
| The Shaqra University e-learning platform has attractive features to appeal to students.                                                              | SYQ6 |
| The Shaqra University e-learning platform provides high-speed information access.                                                                     | SYQ7 |
| In general, I believe that the quality Shaqra University e-learning platform is high.                                                                 | SYQ8 |
| <b>Information Quality IN</b>                                                                                                                         |      |
| Shaqra University e-learning platform has provided me with sufficient and required information.                                                       | IN1  |
| Information and resources needed from Shaqra University e-learning platform are always accessible                                                     | IN2  |
| Information from Shaqra University e-learning platform is in a form that is readily useable                                                           | IN3  |
| Information in Shaqra University e-learning platform is concise and clear                                                                             | IN4  |
| The structure of Shaqra University e-learning platform is well organized into logical and understandable components                                   | IN5  |
| The content of Shaqra University e-learning platform is up to date                                                                                    | IN6  |
| I perceive the design of Shaqra University e-learning platform (e.g. fonts, style, colour, images, videos) to be good and meets the quality standards | IN7  |
| <b>Service Quality SQ</b>                                                                                                                             |      |

|                                                                                                                                   |     |
|-----------------------------------------------------------------------------------------------------------------------------------|-----|
| There are enough and clear instructions/training about how to use Shaqra University e-learning platform                           | SQ1 |
| Shaqra University e-learning platform provides proper online assistance and help                                                  | SQ2 |
| The IT services staff is available and cooperative when facing an error at Shaqra University e-learning platform                  | SQ3 |
| The IT services staff understands the specific needs of students                                                                  | SQ4 |
| I receive a satisfactory and timely response from the IT services staff                                                           | SQ5 |
| <b>Learner Quality LQ</b>                                                                                                         |     |
| I believe it is good to use Shaqra University e-learning platform                                                                 | LQ1 |
| I have a positive attitude toward using Shaqra University e-learning platform                                                     | LQ2 |
| I am not intimidated by using Shaqra University e-learning platform                                                               | LQ3 |
| My previous experience with e-learning systems and computer applications helped me in using Shaqra University e-learning platform | LQ4 |
| I am able to perform tasks in Shaqra University e-learning platform successfully                                                  | LQ5 |
| <b>Instructor Quality IQ</b>                                                                                                      |     |
| I use Shaqra University e-learning platform as recommended by my instructors                                                      | IQ1 |
| I think an instructor's enthusiasm about using Shaqra University e-learning platform stimulates my desire to learn                | IQ2 |
| I receive a prompt response to questions and concerns from my instructors in Shaqra University e-learning platform                | IQ3 |
| I think communicating and interacting with instructors are important and valuable in Shaqra University e-learning platform        | IQ4 |

|                                                                                                                |     |
|----------------------------------------------------------------------------------------------------------------|-----|
| Generally, my instructors have a positive attitude to the utilization of Shaqra University e-learning platform | IQ5 |
| <b>Satisfaction ST</b>                                                                                         |     |
| I am satisfied with the performance of Shaqra University e-learning platform                                   | ST1 |
| I enjoy using Shaqra University e-learning platform in my study                                                | ST2 |
| Shaqra University e-learning platform satisfies my educational needs                                           | ST3 |
| Overall, I am pleased with the experience of using Shaqra University e-learning platform                       | ST4 |
| <b>Perceived Usefulness PU</b>                                                                                 |     |
| Using Shaqra University e-learning platform enables me to accomplish my tasks more quickly                     | PU1 |
| Using Shaqra University e-learning platform improves my learning performance                                   | PU2 |
| Using Shaqra University e-learning platform helps me learn effectively                                         | PU3 |
| Overall Shaqra University e-learning platform is useful                                                        | PU4 |
| <b>Use U</b>                                                                                                   |     |
| I use Shaqra University e-learning platform frequently                                                         | U1  |
| I depend on Shaqra University e-learning platform in my study                                                  | U2  |
| I use Shaqra University e-learning platform regularly                                                          | U3  |
| On average, I spend a long time on using Shaqra University e-learning platform                                 | U4  |
| <b>Benefits B</b>                                                                                              |     |
| The Shaqra University e-learning platform increases my work productivity                                       | B1  |
| The Shaqra University e-learning platform improves the quality of learning.                                    | B2  |

|                                                                                                                               |    |
|-------------------------------------------------------------------------------------------------------------------------------|----|
| The Shaqra University e-learning platform facilitates information exchange                                                    | B3 |
| The Shaqra University e-learning platform improves collaborative and active learning.                                         | B4 |
| The Shaqra University e-learning platform increased knowledge transfer.                                                       | B5 |
| I believe that the Shaqra University e-learning platform helps me to achieve my educational goals..                           | B6 |
| In general, I believe that Shaqra University e-learning platform is successful and provides me more knowledge for my studies. | B7 |
